# Supplementary material for: Extended Prescribing Roles for Pharmacists in Poland—A Survey Study
Source: MDPI journal article supplement (doi:10.3390/ijerph19031648), 2022-01-31
Supplement: s1 [file s1]

## RESEARCH QUESTIONNAIRE

1. After the change in pharmaceutical prescribing rules (01.04.2020), have you issued such a fully-paid prescription to a patient at a pharmacy?

- ☐ Yes
- ☐ No
- ☐ I don't remember

2. Did you issue a *pro auctore* prescription?

- ☐ Yes
- ☐ No
- ☐ I don't remember

If "yes", - please answer the following questions, if "no", "I don't remember" - please go to question 5.

3. If you issued a *pro auctore* prescription, was it a reimbursement prescription?

- ☐ Yes
- ☐ No
- ☐ I don't remember

4. If you issued a *pro auctore* prescription, was it a fully-paid prescription?

- ☐ Yes
- ☐ No
- ☐ I don't remember

5. Did you issue a *pro familiae* prescription?

- ☐ Yes
- ☐ No
- ☐ I don't remember

If "yes" - please answer the following questions, if "no", "I don't remember" - please go to question 8.

6. If you issued a *pro familiae* prescription, was it a reimbursement prescription?

- ☐ Yes
- ☐ No
- ☐ I don't remember

7. If you issued a *pro familiae* prescription, was it a fully-paid prescription?

- ☐ Yes
- ☐ No
- ☐ I don't remember

8. Can you give an estimate of the average number of prescriptions you issued in the last month (including *pro auctore* and *pro familiae* prescriptions)?

- ☐ 0
- ☐ 1 - 5
- ☐ 5 - 10
- ☐ 10 - 15
- ☐ 15 - 20
- ☐ More than 20

9. Considering the prescriptions issued - both for patients and those for yourself or your family members - what was the most common reason for it?

- ☐ repeat prescriptions (renewal of a doctor's order, treatment for chronic diseases)
- ☐ prescriptions for life-saving drugs (e.g. epinephrine, insulin)
- ☐ based on own diagnosis - in the case of a minor illness
- ☐ at the request of patient/family member
- ☐ other reason

10. In your opinion, should a pharmacist be able to issue reimbursement pharmaceutical prescriptions for patients?

- ☐ Yes
- ☐ No

- ☐ I have no opinion
11. In your opinion, should a pharmacist be able to issue pharmaceutical prescriptions as well as *pro auctore* and *pro familiae* prescriptions - for magistral drugs?
- ☐ Yes
- ☐ No
- ☐ I have no opinion
12. Do you think the current rules governing pharmaceutical prescriptions are clear and transparent?
- ☐ Definitely not
- ☐ Rather not
- ☐ Difficult to say
- ☐ Rather yes
- ☐ Definitely yes
13. Do you feel that there is abuse of prescriptions by pharmacists?
- ☐ Yes
- ☐ No
- ☐ I don't know
14. Do you feel anxious about your ability to write prescriptions?
- ☐ Yes
- ☐ No
- ☐ I don't know
15. If "yes", what does your anxiety concern:
- ☐ The possibility of harm to the patient as a result of a misjudgment
- ☐ Problems with reimbursement (NHF)
- ☐ Uncertainties in the current legislation
- ☐ Other reason: ...

#### *Metrics*

16. Professional status:
- ☐ Master of pharmacy in a community pharmacy
- ☐ Manager in a community pharmacy
- ☐ Master of pharmacy in a hospital pharmacy
- ☐ Manager of a hospital pharmacy
- ☐ Job other than in a pharmacy, but related to the profession of pharmacist
17. Professional experience (years)
- ☐ Less than 5
- ☐ 5 - 10
- ☐ 10 - 20
- ☐ More than 20
18. Place of pharmacist's professional activity
- ☐ Individual community pharmacy (not part of a pharmacy chain)
- ☐ Network community pharmacy (small network: several pharmacies)
- ☐ Network community pharmacy (large network: dozens/over 100 pharmacies)
- ☐ Hospital pharmacy
- ☐ Other: ....
19. Pharmacy location/workplace:
- ☐ City of up to 10,000 inhabitants
- ☐ Locality with 11 - 50 thousand inhabitants
- ☐ City with 51 - 200 thousand inhabitants
- ☐ City with more than 200 thousand inhabitants
- ☐ City with more than 200 thousand inhabitants
